# Supplementary material
Source: HighWire-hosted journal article supplement (https://bmjopen.bmj.com/content/10/9/e034359)
Supplement: inline-supplementary-material-1 [file inline-supplementary-material-1.pdf]

Online Supplementary Table 1: Units used in the literature to describe the spatial extent of oedematous and necrotic myocardium measured by T2-weighted and T1-weighted late gadolinium enhancement MRI

|                                                                                                                    | <b>Volumetric unit convertible to % of the whole left ventricular myocardium</b> | <b>Volumetric unit unconvertible to % of the whole left ventricular myocardium</b> | <b>Nonvolumetric unit</b> |
|--------------------------------------------------------------------------------------------------------------------|----------------------------------------------------------------------------------|------------------------------------------------------------------------------------|---------------------------|
| % of left ventricular myocardium                                                                                   | X                                                                                |                                                                                    |                           |
| % of left ventricular tissue                                                                                       | X                                                                                |                                                                                    |                           |
| % of left ventricular mass                                                                                         | X                                                                                |                                                                                    |                           |
| % of left ventricular volume                                                                                       | X                                                                                |                                                                                    |                           |
| % of left ventricular area*                                                                                        | X                                                                                |                                                                                    |                           |
| mass in g                                                                                                          |                                                                                  | X                                                                                  |                           |
| volume in ml                                                                                                       |                                                                                  | X                                                                                  |                           |
| indexed mass in g/m <sup>2</sup> skin surface                                                                      |                                                                                  | X                                                                                  |                           |
| % of left ventricular area**                                                                                       |                                                                                  |                                                                                    | X                         |
| cm <sup>2</sup>                                                                                                    |                                                                                  |                                                                                    | X                         |
| % of left ventricular segments with hyperintensity                                                                 |                                                                                  |                                                                                    | X                         |
| left ventricular segments with hyperintensity                                                                      |                                                                                  |                                                                                    | X                         |
| % of left ventricular circumference                                                                                |                                                                                  |                                                                                    | X                         |
| % of short axis in plane hyperenhancement at the level of maximum signal extent                                    |                                                                                  |                                                                                    | X                         |
| % of left ventricular slice area with maximum signal extent                                                        |                                                                                  |                                                                                    | X                         |
| % of infarcted myocardium compared with the total area of left ventricular wall on three short axis imaging slices |                                                                                  |                                                                                    | X                         |
| % of total slice area                                                                                              |                                                                                  |                                                                                    | X                         |
| % of total endocardial surface                                                                                     |                                                                                  |                                                                                    | X                         |

MRI =magnetic resonance imaging.

\* Measurement of the total amount of hyperintense myocardium in all short axis slices as the percentage of the total amount of the left ventricular area in short axis slices covering the whole left ventricle.

\*\* Measurement of the extent of the short axis in plane hyperintense myocardium in the short axis slice with maximum hyperintense myocardium as the percentage of the left ventricular area in that short axis slice.
