# Supplementary material
Source: HighWire-hosted journal article supplement (https://bmjopen.bmj.com/content/10/9/e034359)
Supplement: inline-supplementary-material-2 [file inline-supplementary-material-2.pdf]

## Online Supplementary File 1: Search terms

### MEDLINE (via PubMed)

("myocardial infarction" [MESH] OR "myocardial infarction\*" OR "myocardial infarct\*" OR "MI" OR "cardiac infarction\*" OR "cardiac infarct\*" OR "heart infarction\*" OR "heart infarct\*" OR "heart attack\*" OR "coronary thrombosis\*\*" OR "deep plaque\*" OR "unstable angina\*" OR "acute coronary syndrome\*" OR "ACS" OR "STEMI" OR "ST elevated" OR "ST elevation" OR "ST segment elevated" OR "ST segment elevation" AND ("magnetic resonance imaging" [MeSH] OR "MRI" OR "magnetic resonance" OR "imaging" OR "MR" OR "CMR") AND ("T2" OR "T2weighted" OR "T2W" OR "spin spin relaxation") AND ("gadolinium" OR "GD" OR "late enhancement" OR "delayed enhancement" OR "LGE"))

### EMBASE (via Ovid)

Heart infarction [EMTREE-Thesaurus] OR myocardial infarction\$.mp OR myocardial infarct\$.mp OR cardiac infarction.mp OR cardiac infarct\$.mp OR heart infarction\$.mp OR heart infarct\$.mp OR heart attack\$.mp OR coronary thrombosis\$.mp OR deep plaque\$.mp OR unstable angina\$.mp OR acute coronary syndrome [EMTREE-Thesaurus] OR acute coronary syndrome\$.mp OR ACS.mp OR ST segment elevation myocardial infarction [EMTREE-Thesaurus] OR ST elevated.mp OR ST elevation.mp OR ST segment elevated.mp OR ST segment elevation [EMTREE-Thesaurus] OR STEMI.mp AND nuclear magnetic resonance imaging\ [EMTREE-Thesaurus] OR MRI.mp OR magnetic resonance.mp OR imaging.mp AND T2.mp OR T2weighted.mp OR T2w.mp OR spin spin relaxation.mp AND gadolinium\ [EMTREE Thesaurus] OR late enhancement.mp OR delayed enhancement.mp OR LGE.mp

### ISI Web of Science

Topic=(( "myocardial infarction\*" OR "myocardial infarct\*" OR "MI" OR "cardiac infarction\*" OR "cardiac infarct\*" OR "heart infarction\*" OR "heart infarct\*" OR "heart attack\*" OR "coronary thrombosis\*\*" OR "deep plaque\*" OR "unstable angina\*" OR "acute coronary syndrome\*" OR "ACS" OR "STEMI" OR "ST elevated" OR "ST elevation" OR "ST segment elevated" OR "ST

segment elevation”) AND ( "MRI" OR "magnetic resonance" OR "imaging" OR "MR" OR “CMR”)  
AND ("T2" OR "T2weighted" OR "T2W" OR "spin spin relaxation") AND ("gadolinium" OR "GD"  
OR "late enhancement" OR "delayed enhancement" OR "LGE"
