# Supplementary material
Source: HighWire-hosted journal article supplement (https://bmjopen.bmj.com/content/10/9/e034359)
Supplement: inline-supplementary-material-3 [file inline-supplementary-material-3.pdf]

## Online Supplementary Table 2: Risk of bias assessment in individual studies

### Selection bias

**Low risk of bias:** Inclusion of an unselected sample of consecutive patients.

**High risk of bias:** Selective recruitment of patients so that the sample obtained is likely not representative of the population intended to be analysed.

**Unclear risk of bias:** Recruitment not described in sufficient detail to evaluate whether consecutive recruitment was performed.

### Attrition bias

**Low risk of bias:** No exclusions from the analysis or provision of plausible reasons for excluding enrolled patients.

**High risk of bias:** Exclusion of enrolled patients from the analysis without provision of plausible reasons.

**Unclear risk of bias:** Uncertainty whether enrolled patients were excluded from the analysis.

### Detection bias

**Low risk of bias:** Quantification of myocardial oedema and necrosis on T2-weighted and T1-weighted late gadolinium enhancement MRI was likely performed without knowledge of the time from symptom onset until reperfusion.

**High risk of bias:** No blinding or blinding was likely ineffective.

**Unclear risk of bias:** It remains unclear whether blinded MRI interpretation was performed.

MRI = magnetic resonance imaging.
