# Supplementary material
Source: HighWire-hosted journal article supplement (https://bmjopen.bmj.com/content/10/9/e034359)
Supplement: inline-supplementary-material-4 [file inline-supplementary-material-4.pdf]

Supplementary Table 3: Mixed effects model for the relation between the time to reperfusion and the MSI on MRI with exclusion of two patient groups having a time to reperfusion of less than 2 hours

| <b>Model fit</b>         |                 |            |                                           |                      |
|--------------------------|-----------------|------------|-------------------------------------------|----------------------|
| <b>logLik</b>            | <b>AIC</b>      | <b>BIC</b> |                                           |                      |
| -421.0                   | 848.0           | 854.5      |                                           |                      |
| <b>Random effects</b>    |                 |            |                                           |                      |
| <b>Factor</b>            | $\sigma^2$      | $\sigma$   | <b>Cochran's Q test for heterogeneity</b> |                      |
| study                    | 178.7           | 13.4       | <b>p</b>                                  |                      |
|                          |                 |            | < 0.001                                   |                      |
| <b>Fixed effects</b>     |                 |            |                                           |                      |
| <b>Factor</b>            | <b>Estimate</b> | <b>p</b>   | <b>Lower 95 % CI</b>                      | <b>Upper 95 % CI</b> |
| (intercept)              | 93.3            | < 0.001    | 85.7                                      | 100.0                |
| Time to reperfusion, min | -13.5           | < 0.001    | -15.2                                     | -11.9                |

logLik = log-likelihood; AIC = Akaike information criterion; BIC = Bayesian information criterion; CI = confidence interval; time to reperfusion = time from symptom onset until revascularization.
