# Supplementary material
Source: HighWire-hosted journal article supplement (https://bmjopen.bmj.com/content/10/9/e034359)
Supplement: inline-supplementary-material-5 [file inline-supplementary-material-5.pdf]

## Online Supplementary Table 4: Mixed effects model with confounding variables

| <b>Model fit</b>                                                  |                 |            |                                           |                      |
|-------------------------------------------------------------------|-----------------|------------|-------------------------------------------|----------------------|
| <b>logLik</b>                                                     | <b>AIC</b>      | <b>BIC</b> |                                           |                      |
| -359.7                                                            | 791.5           | 816.3      |                                           |                      |
| <b>Random effects</b>                                             |                 |            |                                           |                      |
| <b>Factor</b>                                                     | $\sigma^2$      | $\sigma$   | <b>Cochran's Q test for heterogeneity</b> |                      |
|                                                                   |                 |            | <b>p</b>                                  |                      |
| Study                                                             | 91.9            | 9.6        | < 0.001                                   |                      |
| <b>Fixed effects</b>                                              |                 |            |                                           |                      |
| <b>Factor</b>                                                     | <b>Estimate</b> | <b>p</b>   | <b>Lower 95 % CI</b>                      | <b>Upper 95 % CI</b> |
| (intercept)                                                       | 89.3            | < 0.001    | 80.9                                      | 97.7                 |
| Time to reperfusion, hrs                                          | -12.7           | < 0.001    | -14.2                                     | -11.2                |
| Male, % of patients (centred)                                     | -0.4            | <0.001     | -0.6                                      | -0.2                 |
| <b>T2-weighted MRI interpretation</b>                             |                 |            |                                           |                      |
| Signal intensity > 2 SD above remote myocardium                   | --              | --         | --                                        | --                   |
| Manual contouring                                                 | 2.1             | 0.771      | -11.7                                     | 15.8                 |
| FWHM algorithm                                                    | 17.0            | 0.080      | -2.0                                      | 36.1                 |
| <b>T1-weighted late gadolinium enhancement MRI interpretation</b> |                 |            |                                           |                      |
| Signal intensity > 5 SD above remote myocardium                   | --              | --         | --                                        | --                   |
| Signal intensity > 2 SD above remote myocardium                   | -8.0            | 0.144      | -18.7                                     | 2.7                  |
| Signal intensity > 3 SD above remote myocardium                   | 12.6            | 0.266      | -9.6                                      | 34.8                 |
| Manual contouring                                                 | 3.4             | 0.617      | -9.9                                      | 16.7                 |
| FWHM algorithm                                                    | 3.5             | 0.632      | -10.9                                     | 18.0                 |
| Heiberg's method                                                  | 12.5            | 0.202      | -6.7                                      | 31.7                 |
| <b>Timing of MRI</b>                                              |                 |            |                                           |                      |
| 3-7 days after STEMI                                              | --              | --         | --                                        | --                   |
| 1-2 days after STEMI                                              | -11.9           | 0.028      | -22.5                                     | -1.3                 |

logLik = log-likelihood; AIC = Akaike information criterion; BIC = Bayesian information criterion; CI = confidence interval; SD = standard deviation; MRI = magnetic resonance imaging; STEMI = ST-segment elevation myocardial infarction; FWHM = full width at half maximum; time to reperfusion = time from symptom onset until revascularization.
