# Supplementary material
Source: HighWire-hosted journal article supplement (https://bmjopen.bmj.com/content/10/9/e034359)
Supplement: inline-supplementary-material-7 [file inline-supplementary-material-7.pdf]

## Online Supplementary Table 6: Attrition bias in individual studies

| Title                                                                                                                                                                                                           | First author      | Journal                 | Year | Judgement on the risk of attrition bias | Quote                                                                                                                                                                                                                                                                                                                                                                                                                                         | Comment                                                                   |
|-----------------------------------------------------------------------------------------------------------------------------------------------------------------------------------------------------------------|-------------------|-------------------------|------|-----------------------------------------|-----------------------------------------------------------------------------------------------------------------------------------------------------------------------------------------------------------------------------------------------------------------------------------------------------------------------------------------------------------------------------------------------------------------------------------------------|---------------------------------------------------------------------------|
| Myocardial Extracellular Volume Fraction Allows Differentiation of Reversible Versus Irreversible Myocardial Damage and Prediction of Adverse Left Ventricular Remodeling of ST-Elevation Myocardial Infarction | Chen              | J Magn Reson Imaging    | 2020 | Low                                     | Twenty-eight patients were recruited, three of whom had a three-vessel disease, and one had severe arrhythmias.                                                                                                                                                                                                                                                                                                                               | Reasons for excluding enrolled patients from analysis were given.         |
| Acute Microvascular Impairment Post-Reperused STEMI Is Reversible and Has Additional Clinical Predictive Value: A CMR OxAMI Study                                                                               | Borlotti          | JACC Cardiovasc Imaging | 2019 | Low                                     | Of 104 patients with STEMI who consented, 40 were excluded because of claustrophobia or technical issues (n = 12), bystander cardiomyopathy (n = 6), poor-quality image (n = 10), and declined follow-up scan (n = 12). A total of 64 patients underwent acute and follow-up scan. The measurement of IMR, CFR, and T <sub>1</sub> was feasible in 53 of 64 patients. Clinical and demographic baseline characteristics are shown in Table 1. | Reasons for excluding enrolled patients from analysis were given.         |
| Elevated serum uric acid affects myocardial reperfusion and infarct size in patients with ST-segment elevation myocardial infarction undergoing primary percutaneous coronary intervention                      | Mandurino-Mirizzi | J Cardiovasc Med        | 2018 | Low                                     | Out of the dataset including 126 patients, we analyzed N = 101 patients, of whom 87 (86.1%) presented with anterior myocardial infarction (MI), who had CMR and SUA data: eSUA was present in 16 (15.8%) patients; none of the patients was assuming allopurinol or febuxostat at the time of the index event.                                                                                                                                | Reasons for excluding enrolled patients from analysis were given.         |
| Dynamic changes in injured myocardium, very early after acute myocardial infarction, quantified using T1 mapping cardiovascular magnetic resonance                                                              | Alkhalil          | J Cardiovasc Magn Reson | 2018 | Unclear                                 | NA                                                                                                                                                                                                                                                                                                                                                                                                                                            | It remains unclear whether enrolled patients were excluded from analysis. |

|                                                                                                                                                                                                     |          |                                |      |         |                                                                                                                                                                                                                                                                                                                                                                                                                                  |                                                                              |
|-----------------------------------------------------------------------------------------------------------------------------------------------------------------------------------------------------|----------|--------------------------------|------|---------|----------------------------------------------------------------------------------------------------------------------------------------------------------------------------------------------------------------------------------------------------------------------------------------------------------------------------------------------------------------------------------------------------------------------------------|------------------------------------------------------------------------------|
| CMR Native T1 Mapping Allows Differentiation of Reversible Versus Irreversible Myocardial Damage in ST-Segment-Elevation Myocardial Infarction: An OxAMI Study (Oxford Acute Myocardial Infarction) | Liu      | Circ Cardiovasc Imaging        | 2017 | Unclear | NA                                                                                                                                                                                                                                                                                                                                                                                                                               | It remains unclear whether enrolled patients were excluded from analysis.    |
| Acute Infarct Extracellular Volume Mapping to Quantify Myocardial Area at Risk and Chronic Infarct Size on Cardiovascular Magnetic Resonance Imaging                                                | Garg     | Circ Cardiovasc Imaging        | 2017 | Low     | Seventy patients were considered for inclusion, of which 50 had baseline and follow-up CMR (Figure 1).                                                                                                                                                                                                                                                                                                                           | Reasons for excluding enrolled patients from analysis were given.            |
| Morphine Does Not Affect Myocardial Salvage in ST-Segment Elevation Myocardial Infarction                                                                                                           | Gwag     | Plos One                       | 2017 | Low     | NA                                                                                                                                                                                                                                                                                                                                                                                                                               | A flow chart indicates that the data of all included patients were analyzed. |
| Multi-vendor, multicentre comparison of contrast-enhanced SSFP and T2-STIR CMR for determining myocardium at risk in ST-elevation myocardial infarction                                             | Nordlund | Eur Heart J Cardiovasc Imaging | 2016 | Low     | Of the 215 patients included in the study, 200 (93%) had complete T2-STIR datasets, 204 (95%) had complete CE-SSFP datasets, and 191 (89%) had complete LGE datasets. [...] Sixty-five per cent of T2-STIR vs. 97% of CE-SSFP datasets were considered of diagnostic quality (P, 0.001, Figure 1).                                                                                                                               | Reasons for excluding enrolled patients from analysis were given.            |
| T mapping for assessment of myocardial injury and microvascular obstruction at one week post myocardial infarction                                                                                  | Cameron  | Eur J Radiol                   | 2015 | Low     | NA                                                                                                                                                                                                                                                                                                                                                                                                                               | The data of all included patients were analyzed.                             |
| Prognosis after ST-elevation myocardial infarction: a study on cardiac magnetic resonance imaging versus clinical routine                                                                           | deWaha   | Trials                         | 2014 | High    | The reasons for a lack of CMR were claustrophobia (n = 19), death prior to CMR (n = 18), refusal (n = 15), pacemaker (n = 5), obesity (n = 7) and reasons that could not be further clarified (n = 10). Due to a prior myocardial infarction, 29 additional patients were excluded. T2-weighted imaging covering the whole left ventricle was performed in 287 patients. T2-weighted images of 29 patients were of poor quality, | Ten patients were excluded from analysis for reasons not specified.          |

|                                                                                                                                                                                                                                                  |       |                          |      |     |                                                                                                                                                                                                                                                                                                                                                                                                                                                               |                                                                                   |
|--------------------------------------------------------------------------------------------------------------------------------------------------------------------------------------------------------------------------------------------------|-------|--------------------------|------|-----|---------------------------------------------------------------------------------------------------------------------------------------------------------------------------------------------------------------------------------------------------------------------------------------------------------------------------------------------------------------------------------------------------------------------------------------------------------------|-----------------------------------------------------------------------------------|
|                                                                                                                                                                                                                                                  |       |                          |      |     | but judged to be analyzable. Finally, follow-up was completed in 278 (97%) patients.                                                                                                                                                                                                                                                                                                                                                                          |                                                                                   |
| Impact of overweight on myocardial infarct size in patients undergoing primary percutaneous coronary interventions: A magnetic resonance imaging study                                                                                           | Sohn  | Atherosclerosis          | 2014 | Low | From January 2006 to November 2009, 349 STEMI patients visited the emergency room at Samsung Medical Center. Among them, 62 patients presented >12 h after symptom onset and 30 patients who did not receive primary PCI, but received coronary artery bypass surgery or thrombolysis, and were thus excluded from this study. Twenty-seven patients who refused to undergo CMR or did not undergo CMR because of hemodynamic instability were also excluded. | Reasons for excluding enrolled patients from analysis were given.                 |
| Impact of white blood cell count on myocardial salvage, infarct size, and clinical outcomes in patients undergoing primary percutaneous coronary intervention for ST-segment elevation myocardial infarction: a magnetic resonance imaging study | Chung | Int J Cardiovasc Imaging | 2014 | Low | NA                                                                                                                                                                                                                                                                                                                                                                                                                                                            | The data of all included patients were analyzed.                                  |
| Intracoronary compared with intravenous bolus abciximab application during primary percutaneous coronary intervention in ST-segment elevation myocardial infarction: cardiac magnetic resonance substudy of the AIDA STEMI trial                 | Eitel | J Am Coll Cardiol        | 2013 | Low | NA                                                                                                                                                                                                                                                                                                                                                                                                                                                            | Reasons for excluding enrolled patients from analysis were given in a flow chart. |
| Remote ischemic post-conditioning of the lower limb during primary percutaneous coronary intervention safely reduces enzymatic infarct size in anterior myocardial infarction: a randomized controlled trial                                     | Crimi | JACC Cardiovasc Interv   | 2013 | Low | We enrolled 100 patients. Four patients (2 RIPC and 2 control) had missing blood samples for primary endpoint assessment and were excluded.                                                                                                                                                                                                                                                                                                                   | Reasons for excluding enrolled patients from analysis were given.                 |

|                                                                                                                                                                                                               |            |                                |      |     |                                                                                                                                                                                                   |                                                                                   |
|---------------------------------------------------------------------------------------------------------------------------------------------------------------------------------------------------------------|------------|--------------------------------|------|-----|---------------------------------------------------------------------------------------------------------------------------------------------------------------------------------------------------|-----------------------------------------------------------------------------------|
| The assessment of area at risk and myocardial salvage after coronary revascularization in acute myocardial infarction: comparison between CMR and SPECT                                                       | Hadamitzky | JACC<br>Cardiovasc<br>Imaging  | 2013 | Low | Of these, 27 were excluded because the image quality of the CMR study was insufficient for automated analysis (all in T2 studies), resulting in a study population of 180 patients.               | Reasons for excluding enrolled patients from analysis were given.                 |
| Right ventricular injury in ST-elevation myocardial infarction: risk stratification by visualization of wall motion, edema, and delayed-enhancement cardiac magnetic resonance                                | Grothoff   | Circ<br>Cardiovasc<br>Imaging  | 2012 | Low | Image quality for RV edema quantification was inappropriate in 29 (6.4%) patients; 7 patients were lost to follow-up. In 414 patients, clinical outcome data were available.                      | Reasons for excluding enrolled patients from analysis were given.                 |
| Distal protection device aggravated microvascular obstruction evaluated by cardiac MR after primary percutaneous intervention for ST-elevation myocardial infarction                                          | Yoon       | Int J Cardiol                  | 2012 | Low | NA                                                                                                                                                                                                | Reasons for excluding enrolled patients from analysis were given in a flow chart. |
| Comparison of magnetic resonance imaging findings in non-ST-segment elevation versus ST-segment elevation myocardial infarction patients undergoing early invasive intervention                               | Xu         | Int J<br>Cardiovasc<br>Imaging | 2012 | Low | NA                                                                                                                                                                                                | The data of all included patients were analyzed.                                  |
| T2-weighted cardiac MR assessment of the myocardial area-at-risk and salvage area in acute reperfused myocardial infarction: Comparison of state-of-the-art dark blood and bright blood T2-weighted sequences | Viallon    | J Cardio<br>Magn Reson         | 2012 | Low | The quality of the images was judged excellent and adequate for analysis in all 30 CMR datasets.                                                                                                  | The data of all included patients were analyzed.                                  |
| A high loading dose of clopidogrel reduces myocardial infarct size in patients undergoing primary                                                                                                             | Song       | Am Heart J                     | 2012 | Low | Of 207 patients who underwent CE-MRI, 9 patients were excluded from the present analysis, including 3 patients with evidence of previous myocardial infarction on CE-MRI, 1 patient with subacute | Reasons for excluding enrolled patients from analysis were given.                 |

|                                                                                                                                                                                                         |          |                           |      |     |                                                                                                                                                                                                                                                                                                                                                                                                                                                                                                                                                               |                                                                   |
|---------------------------------------------------------------------------------------------------------------------------------------------------------------------------------------------------------|----------|---------------------------|------|-----|---------------------------------------------------------------------------------------------------------------------------------------------------------------------------------------------------------------------------------------------------------------------------------------------------------------------------------------------------------------------------------------------------------------------------------------------------------------------------------------------------------------------------------------------------------------|-------------------------------------------------------------------|
| percutaneous coronary intervention: a magnetic resonance imaging study                                                                                                                                  |          |                           |      |     | stent thrombosis before CE-MRI, and 5 patients with unavailable clopidogrel loading dose data in the referring hospital.                                                                                                                                                                                                                                                                                                                                                                                                                                      |                                                                   |
| Microvascular resistance predicts myocardial salvage and infarct characteristics in st-elevation myocardial infarction                                                                                  | Payne    | J Am Heart Assoc          | 2012 | Low | NA                                                                                                                                                                                                                                                                                                                                                                                                                                                                                                                                                            | The data of all included patients were analyzed.                  |
| Quantification of myocardial area at risk: validation of coronary angiographic scores with cardiovascular magnetic resonance methods                                                                    | Moral    | Rev Esp Cardiol (Engl Ed) | 2012 | Low | Five (7%) patients were excluded since CMR could not be performed owing to claustrophobia, and none of them for other causes. Data from the remaining 70 patients were evaluated.                                                                                                                                                                                                                                                                                                                                                                             | Reasons for excluding enrolled patients from analysis were given. |
| Analysis of post-infarction salvaged myocardium by cardiac magnetic resonance. Predictors and influence on adverse ventricular remodeling                                                               | Monmeneu | Rev Esp Cardiol (Engl Ed) | 2012 | Low | NA                                                                                                                                                                                                                                                                                                                                                                                                                                                                                                                                                            | Reasons for excluding enrolled patients from analysis were given. |
| Aborted Myocardial Infarction: Evaluation of Changes in Area at Risk, Late Gadolinium Enhancement, and Perfusion Over Time and Comparison With Overt Myocardial Infarction                              | Lee      | AJR Am J Roentgenol       | 2012 | Low | NA                                                                                                                                                                                                                                                                                                                                                                                                                                                                                                                                                            | The data of all included patients were analyzed.                  |
| Cardiovascular magnetic resonance-derived intramyocardial hemorrhage after STEMI: Influence on long-term prognosis, adverse left ventricular remodeling and relationship with microvascular obstruction | Husser   | Int J Cardiol             | 2013 | Low | In total, 335 patients underwent a CMR study at the 1st week after STEMI (median 6 days). Of these, 31 patients (9%) were excluded from the study due to insufficient image quality in T2 imaging, resulting in 304 patients with a complete 1st week CMR study. For evaluation of late LV remodeling after STEMI, CMR was repeated at 6 months (189±32 days) in 234 patients. The reasons for exclusion were: MACE during the first 6 months (n=23), contraindications to CMR (n=14), patient/cardiologist decision (n=26) or patient not contactable (n=7). | Reasons for excluding enrolled patients from analysis were given. |

|                                                                                                                                                                                                     |         |                                |      |         |                                                                                                                                                                                                                                                                                                                                                                           |                                                                                   |
|-----------------------------------------------------------------------------------------------------------------------------------------------------------------------------------------------------|---------|--------------------------------|------|---------|---------------------------------------------------------------------------------------------------------------------------------------------------------------------------------------------------------------------------------------------------------------------------------------------------------------------------------------------------------------------------|-----------------------------------------------------------------------------------|
| Reliability of myocardial salvage assessment by cardiac magnetic resonance imaging in acute reperfused myocardial infarction                                                                        | Desch   | Int J<br>Cardiovasc<br>Imaging | 2012 | Low     | NA                                                                                                                                                                                                                                                                                                                                                                        | The data of all included patients were analyzed.                                  |
| Dynamic Changes in ST Segment Resolution After Myocardial Infarction and the Association with Microvascular Injury on Cardiac Magnetic Resonance Imaging                                            | Weaver  | Heart Lung<br>Circ             | 2011 | Low     | Forty-three patients were enrolled in the trial and 41 successfully completed the CMR. Two were unable to undergo the CMR due to severe claustrophobia.                                                                                                                                                                                                                   | Reasons for excluding enrolled patients from analysis were given.                 |
| Reperfusion haemorrhage as determined by cardiovascular MRI is a predictor of adverse left ventricular remodelling and markers of late arrhythmic risk                                              | Mather  | Heart                          | 2011 | Low     | Fifty-three patients were recruited. Two patients were unable to complete the first CMR scan due to claustrophobia. Two patients refused to attend follow-up and one patient died from an intracranial haemorrhage before follow-up. Therefore, 48 patients completed baseline and follow-up CMR scans.                                                                   | Reasons for excluding enrolled patients from analysis were given.                 |
| Timing of cardiovascular MR imaging after acute myocardial infarction: effect on estimates of infarct characteristics and prediction of late ventricular remodeling                                 | Mather  | Radiology                      | 2011 | Low     | Fifty-seven patients were recruited. Four patients were unable to complete the first cardiovascular MR examination because of claustrophobia, and a further four patients refused to attend follow-up. One patient died of an intracranial hemorrhage before final follow-up. Therefore, 48 patients completed baseline and all follow-up cardiovascular MR examinations. | Reasons for excluding enrolled patients from analysis were given.                 |
| Myocardium at risk in ST-segment elevation myocardial infarction: comparison of T2-weighted edema imaging with the MR-assessed endocardial surface area and validation against angiographic scoring | Fuernau | JACC<br>Cardiovasc<br>Imaging  | 2011 | Low     | NA                                                                                                                                                                                                                                                                                                                                                                        | Reasons for excluding enrolled patients from analysis were given in a flow chart. |
| The evaluation of an electrocardiographic myocardial ischemia acuteness score to predict the                                                                                                        | Engblom | J<br>Electrocardiol            | 2011 | Unclear | NA                                                                                                                                                                                                                                                                                                                                                                        | It remains unclear whether enrolled patients were excluded from analysis.         |

|                                                                                                                                                                                                                                                  |         |                         |      |     |                                                                                                                                                                                                 |                                                                                   |
|--------------------------------------------------------------------------------------------------------------------------------------------------------------------------------------------------------------------------------------------------|---------|-------------------------|------|-----|-------------------------------------------------------------------------------------------------------------------------------------------------------------------------------------------------|-----------------------------------------------------------------------------------|
| amount of myocardial salvage achieved by early percutaneous coronary intervention Clinical validation with myocardial perfusion single photon emission computed tomography and cardiac magnetic resonance                                        |         |                         |      |     |                                                                                                                                                                                                 |                                                                                   |
| Prognostic value and determinants of a hypointense infarct core in T2-weighted cardiac magnetic resonance in acute reperfused ST-elevation-myocardial infarction                                                                                 | Eitel   | Circ Cardiovasc Imaging | 2011 | Low | NA                                                                                                                                                                                              | Reasons for excluding enrolled patients from analysis were given in a flow chart. |
| Long-term prognostic value of myocardial salvage assessed by cardiovascular magnetic resonance in acute reperfused myocardial infarction                                                                                                         | Eitel   | Heart                   | 2011 | Low | NA                                                                                                                                                                                              | Reasons for excluding enrolled patients from analysis were given in a flow chart. |
| Cardiovascular magnetic resonance of the myocardium at risk in acute reperfused myocardial infarction: comparison of T2-weighted imaging versus the circumferential endocardial extent of late gadolinium enhancement with transmural projection | Ubachs  | J Cardiovasc Magn Reson | 2010 | Low | NA                                                                                                                                                                                              | The data of all included patients were analyzed.                                  |
| Myocardial salvage by CMR correlates with LV remodeling and early ST-segment resolution in acute myocardial infarction                                                                                                                           | Masci   | JACC Cardiovasc Imaging | 2010 | Low | Thirty-seven (12%) patients were excluded from the study because of insufficient T2-weighted imaging quality, yielding a total of 260 patients (218 men, age 59+11 years). P                    | Reasons for excluding enrolled patients from analysis were given.                 |
| A pilot study of rapid cooling by cold saline and endovascular cooling before                                                                                                                                                                    | Gotberg | Circ Cardiovasc Interv  | 2010 | Low | One patient in the normothermia group had a visible thrombus in the left main coronary artery and underwent emergency CABG after angiography had been performed and was therefore excluded from | Reasons for excluding enrolled patients from analysis were given.                 |

|                                                                                                                                                                                                                        |          |                         |      |     |                                                                                                                                                                                                                                                                                                     |                                                                   |
|------------------------------------------------------------------------------------------------------------------------------------------------------------------------------------------------------------------------|----------|-------------------------|------|-----|-----------------------------------------------------------------------------------------------------------------------------------------------------------------------------------------------------------------------------------------------------------------------------------------------------|-------------------------------------------------------------------|
| reperfusion in patients with ST-elevation myocardial infarction                                                                                                                                                        |          |                         |      |     | further analysis. One patient in the hypothermia group was prevented from immediate angiography because there was another STEMI patient at the catheterization laboratory, delaying cooling beyond the prespecified 6 hours duration of ischemia, and was therefore excluded from further analysis. |                                                                   |
| Quantification of myocardial area at risk with T2-weighted CMR: comparison with contrast-enhanced CMR and coronary angiography                                                                                         | Wright   | JACC Cardiovasc Imaging | 2009 | Low | This study comprises 108 of the 119 patients in whom T2W CMR-derived AAR quantification was able to be performed.                                                                                                                                                                                   | Reasons for excluding enrolled patients from analysis were given. |
| Impact of primary coronary angioplasty delay on myocardial salvage, infarct size, and microvascular damage in patients with ST-segment elevation myocardial infarction: insight from cardiovascular magnetic resonance | Francone | J Am Coll Cardiol       | 2009 | Low | Seventy-five patients were initially recruited, but 5 patients were excluded because of claustrophobia (n = 3) or clinical instability (n = 2). A follow-up CMR was performed in 58 patients; the remaining 12 patients declined.                                                                   | Reasons for excluding enrolled patients from analysis were given. |
