# Supplementary material
Source: HighWire-hosted journal article supplement (https://bmjopen.bmj.com/content/10/9/e034359)
Supplement: inline-supplementary-material-10 [file inline-supplementary-material-10.pdf]

## Online Supplementary Table 8: Raw data

| Title                                                                                                                                                                                                           | First author      | Journal                 | Year | Purpose                                                                                                                                                                                                                               | Patient group                | Patients, n | Mean or median age, years (SD or IQR) | Male, % | Mean or median time to reperfusion, hours (SD or IQR) | T2-weighted MRI sequence                           | T2-weighted MRI interpretation                  | T1-weighted late gadolinium enhancement MRI sequence | T1-weighted late gadolinium enhancement MRI interpretation | Spatial extent of myocardial oedema on T2-weighted MRI, % of LV myocardium (SD or IQR) | Spatial extent of myocardial necrosis measured by T1-weighted late gadolinium enhancement MRI, % of LV myocardium (SD or IQR) | MSI, % (SD or IQR) |
|-----------------------------------------------------------------------------------------------------------------------------------------------------------------------------------------------------------------|-------------------|-------------------------|------|---------------------------------------------------------------------------------------------------------------------------------------------------------------------------------------------------------------------------------------|------------------------------|-------------|---------------------------------------|---------|-------------------------------------------------------|----------------------------------------------------|-------------------------------------------------|------------------------------------------------------|------------------------------------------------------------|----------------------------------------------------------------------------------------|-------------------------------------------------------------------------------------------------------------------------------|--------------------|
| Myocardial Extracellular Volume Fraction Allows Differentiation of Reversible Versus Irreversible Myocardial Damage and Prediction of Adverse Left Ventricular Remodeling of ST-Elevation Myocardial Infarction | Chen              | J Magn Reson Imaging    | 2020 | To evaluate the extracellular volume fraction (ECV) in the differentiation of reversible from irreversible myocardial injury and the prediction value of left ventricular adverse remodeling in patients with STEMI after reperfusion | all patients                 | 24          | 62 (10)                               | 75      | 5 (2.4)                                               | T2-weighted dark-blood TSE/FSE with IR (STIR)      | Signal intensity > 2 SD above remote myocardium | PSIR using segmented FLASH readout (SPGR)            | FWHM algorithm                                             | 34.4 (15.1)                                                                            | 30.8 (14.9)                                                                                                                   | NA                 |
| Acute Microvascular Impairment Post-Reperused STEMI Is Reversible and Has Additional Clinical Predictive Value: A CMR OxAMI Study                                                                               | Borlotti          | JACC Cardiovasc Imaging | 2019 | This study sought to investigate the clinical utility and the predictive relevance of absolute rest myocardial blood flow by cardiac magnetic resonance in acute myocardial infarction.                                               | all patients                 | 64          | 60 (9)                                | 78.1    | 3 (2.3, 4)                                            | T2-prepared bright-blood single-shot balanced SSFP | Signal intensity > 2 SD above remote myocardium | PSIR using segmented FLASH readout (SPGR)            | Signal intensity > 5 SD above remote myocardium            | 40 (33, 48)                                                                            | 25 (14, 32)                                                                                                                   | NA                 |
| Elevated serum uric acid affects myocardial reperfusion and infarct size in patients with ST-segment elevation myocardial infarction undergoing primary percutaneous coronary intervention                      | Mandurino-Mirizzi | J Cardiovasc Med        | 2018 | Our aim was to correlate eSUA with infarct size, infarct size shrinkage, myocardial reperfusion grade and long-term mortality in STEMI patients undergoing primary percutaneous coronary intervention.                                | elevated serum uric acid     | 16          | 59 (12.5)                             | 100     | 4.1 (1.7)                                             | T2-weighted dark-blood TSE/FSE with IR (STIR)      | Signal intensity > 2 SD above remote myocardium | PSIR using segmented FLASH readout (SPGR)            | Signal intensity > 5 SD above remote myocardium            | 42 (14.5)                                                                              | 31.8 (14.9)                                                                                                                   | 24.5 (13.2)        |
|                                                                                                                                                                                                                 |                   |                         |      |                                                                                                                                                                                                                                       | non-elevated serum uric acid | 85          | 57.6 (10.7)                           | 90.6    | 3.4 (1.4)                                             | T2-weighted dark-blood TSE/FSE with IR (STIR)      | Signal intensity > 2 SD above remote myocardium | PSIR using segmented FLASH readout (SPGR)            | Signal intensity > 5 SD above remote myocardium            | 35.2 (11.6)                                                                            | 25.3 (10.3)                                                                                                                   | 28.1 (18.6)        |
| Dynamic changes in injured myocardium, very early after acute myocardial infarction, quantified using T1 mapping cardiovascular magnetic resonance                                                              | Alkhalil          | J Cardiov Magn Reson    | 2018 | We studied the temporal changes in the extent and intensity of injured myocardium using T1-mapping technique within the first week after STEMI.                                                                                       | all patients                 | 16          | 56 (8)                                | 100     | 2.8 (1.7, 4.2)                                        | T2-prepared bright-blood single-shot balanced SSFP | Signal intensity > 2 SD above remote myocardium | PSIR using segmented FLASH readout (SPGR)            | Signal intensity > 5 SD above remote myocardium            | 42 (15)                                                                                | 23 (13, 32)                                                                                                                   | NA                 |
| CMR Native T1 Mapping Allows Differentiation of Reversible Versus Irreversible Myocardial Damage in ST-Segment-Elevation Myocardial Infarction: An OxAMI Study (Oxford Acute Myocardial Infarction)             | Liu               | Circ Cardiovasc Imaging | 2017 | We sought to investigate the ability of acute native T1 mapping to differentiate reversible and irreversible myocardial injury and its predictive value for left ventricular remodeling.                                              | all patients                 | 60          | 61 (10)                               | 82      | 3.9 (3.4)                                             | T2-prepared bright-blood single-shot balanced SSFP | Signal intensity > 2 SD above remote myocardium | PSIR using segmented FLASH readout (SPGR)            | FWHM algorithm                                             | 41 (14)                                                                                | 27 (12)                                                                                                                       | NA                 |
| Acute Infarct Extracellular Volume Mapping to Quantify Myocardial Area at Risk and Chronic Infarct Size                                                                                                         | Garg              | Circ Cardiovasc Imaging | 2017 | The main aim of this study was to investigate whether acute extracellular volume maps can reliably                                                                                                                                    | 1.5T LGE fwhm                | 32          | 61 (12)                               | 81      | 3.9 (2.4, 6.4)                                        | T2-weighted dark-blood TSE/FSE with IR (STIR)      | FWHM algorithm                                  | PSIR using segmented FLASH readout (SPGR)            | FWHM algorithm                                             | 47.3 (19.2)                                                                            | 28.8 (15.7)                                                                                                                   | NA                 |

|                                                                                                                                                         |          |                                |      |                                                                                                                                                                                                                                                                                             |                                               |     |               |          |                |                                               |                                                 |                                           |                                                 |                   |                   |                   |
|---------------------------------------------------------------------------------------------------------------------------------------------------------|----------|--------------------------------|------|---------------------------------------------------------------------------------------------------------------------------------------------------------------------------------------------------------------------------------------------------------------------------------------------|-----------------------------------------------|-----|---------------|----------|----------------|-----------------------------------------------|-------------------------------------------------|-------------------------------------------|-------------------------------------------------|-------------------|-------------------|-------------------|
| on Cardiovascular Magnetic Resonance Imaging                                                                                                            |          |                                |      | quantify myocardial area at risk and final infarct size.                                                                                                                                                                                                                                    | 1.5T LGE SSD                                  | 32  | 61 (12)       | 81       | 3.9 (2.4, 6.4) | T2-weighted dark-blood TSE/FSE with IR (STIR) | FWHM algorithm                                  | PSIR using segmented FLASH readout (SPGR) | Signal intensity > 5 SD above remote myocardium | 47.3 (19.2)       | 28.1 (17)         | NA                |
|                                                                                                                                                         |          |                                |      |                                                                                                                                                                                                                                                                                             | 3T LGE fwhm                                   | 18  | 57 (11)       | 89       | 3.7 (3.1, 6.8) | T2-weighted dark-blood TSE/FSE with IR (STIR) | FWHM algorithm                                  | PSIR using segmented FLASH readout (SPGR) | FWHM algorithm                                  | 47.5 (16.2)       | 25.2 (12.2)       | NA                |
|                                                                                                                                                         |          |                                |      |                                                                                                                                                                                                                                                                                             | 3T LGE SSD                                    | 18  | 57 (11)       | 89       | 3.7 (3.1, 6.8) | T2-weighted dark-blood TSE/FSE with IR (STIR) | FWHM algorithm                                  | PSIR using segmented FLASH readout (SPGR) | Signal intensity > 5 SD above remote myocardium | 47.5 (16.2)       | 28.6 (16.5)       | NA                |
| Morphine Does Not Affect Myocardial Salvage in ST-Segment Elevation Myocardial Infarction                                                               | Gwag     | Plos One                       | 2017 | We investigated myocardial salvage index to determine whether intravenous morphine affects myocardial injury adversely in STEMI patients undergoing primary percutaneous coronary intervention.                                                                                             | no morphine                                   | 203 | 60 (52, 70)   | 80.78818 | 3.7 (2.1, 6.7) | T2-weighted dark-blood TSE/FSE with IR (STIR) | Manual contouring                               | PSIR using segmented FLASH readout (SPGR) | Manual contouring                               | 33.4 (22.6, 42.3) | 18.3 (12.4, 25.8) | 42 (29.5, 55.3)   |
|                                                                                                                                                         |          |                                |      |                                                                                                                                                                                                                                                                                             | morphine                                      | 96  | 58.5 (50, 66) | 80.20833 | 2.6 (1.7, 5.5) | T2-weighted dark-blood TSE/FSE with IR (STIR) | Manual contouring                               | PSIR using segmented FLASH readout (SPGR) | Manual contouring                               | 41.1 (28.8, 52.3) | 22.2 (12.9, 29.6) | 46.1 (34, 58.7)   |
| Multi-vendor, multicentre comparison of contrast-enhanced SSFP and T2-STIR CMR for determining myocardium at risk in ST-elevation myocardial infarction | Nordlund | Eur Heart J Cardiovasc Imaging | 2016 | We aimed to determine how T2-short tau inversion recovery and contrast-enhanced steady-state free precession magnetic resonance imaging perform in determining myocardium at risk when applied in multicentre, multi-vendor settings.                                                       | all patients                                  | 215 | 60.2 (40, 86) | 84       | 3.1 (1.2)      | T2-weighted dark-blood TSE/FSE with IR (STIR) | Manual contouring                               | PSIR using segmented FLASH readout (SPGR) | Manual contouring                               | 36 (11)           | 17 (10)           | NA                |
| T mapping for assessment of myocardial injury and microvascular obstruction at one week post myocardial infarction                                      | Cameron  | Eur J Radiol                   | 2015 | To compare 3 tesla T1 mapping to conventional T2-weighted imaging for delineating myocardial oedema one week after STEMI, and to explore the confounding effects of microvascular obstruction on each technique.                                                                            | microvascular obstruction                     | 35  | 58 (29, 88)   | 80       | 4.1 (1.1, 8.2) | T2-weighted dark-blood TSE/FSE with IR (STIR) | Signal intensity > 2 SD above remote myocardium | PSIR using segmented FLASH readout (SPGR) | Signal intensity > 5 SD above remote myocardium | 48 (13)           | NA                | 59 (25)           |
|                                                                                                                                                         |          |                                |      |                                                                                                                                                                                                                                                                                             | no microvascular obstruction                  | 27  | 60 (46, 83)   | 66.66667 | 3.3 (0.8, 12)  | T2-weighted dark-blood TSE/FSE with IR (STIR) | Signal intensity > 2 SD above remote myocardium | PSIR using segmented FLASH readout (SPGR) | Signal intensity > 5 SD above remote myocardium | 28 (11)           | NA                | 75 (17)           |
| Prognosis after ST-elevation myocardial infarction: a study on cardiac magnetic resonance imaging versus clinical routine                               | deWaha   | Trials                         | 2014 | This study aimed to evaluate the incremental prognostic value of infarct size, microvascular obstruction, MSI, and LV ejection fraction assessed by cardiac MR imaging in comparison to traditional outcome markers in patients with STEMI reperfused by primary percutaneous intervention. | occurrence of a major cardiovascular event    | 52  | 69 (60, 77)   | 69.23077 | 3.5 (2.3, 6.6) | T2-weighted dark-blood TSE/FSE with IR (STIR) | Signal intensity > 2 SD above remote myocardium | PSIR using segmented FLASH readout (SPGR) | Signal intensity > 5 SD above remote myocardium | NA                | 31.5 (22.5, 40)   | 27 (10, 39.7)     |
|                                                                                                                                                         |          |                                |      |                                                                                                                                                                                                                                                                                             | no occurrence of a major cardiovascular event | 226 | 64 (55, 72)   | 72.56637 | 3.2 (2.1, 5.6) | T2-weighted dark-blood TSE/FSE with IR (STIR) | Signal intensity > 2 SD above remote myocardium | PSIR using segmented FLASH readout (SPGR) | Signal intensity > 5 SD above remote myocardium | NA                | 13.1 (5.7, 22.4)  | 67.4 (47.9, 83.3) |
| Impact of overweight on myocardial infarct size in patients undergoing primary percutaneous coronary interventions: A magnetic resonance imaging study  | Sohn     | Atherosclerosis                | 2014 | We evaluated the impact of overweight on myocardial infarct size in patients undergoing primary percutaneous intervention for STEMI.                                                                                                                                                        | body mass index beyond 25                     | 110 | 58.3 (12.6)   | 84.54545 | 4.8 (2.8, 7.4) | T2-weighted dark-blood TSE/FSE with IR (STIR) | Manual contouring                               | PSIR using segmented FLASH readout (SPGR) | Manual contouring                               | 36 (25.7, 49.6)   | 20.8 (11.4, 33.1) | 39.2 (24.6, 59.6) |
|                                                                                                                                                         |          |                                |      |                                                                                                                                                                                                                                                                                             | body mass index above 25                      | 83  | 56.2 (11)     | 90.36145 | 4.3 (2.6, 6.8) | T2-weighted dark-blood TSE/FSE                | Manual contouring                               | PSIR using segmented FLASH                | Manual contouring                               | 29.4 (20.5, 37.6) | 17.9 (9, 24.9)    | 43.2 (27.7, 54.4) |

|                                                                                                                                                                                                                                                  |            |                          |      |                                                                                                                                                                                                                                                                                                                                 |                                                 |     |                 |          |                |                                               |                                                 |                                           |                                                 |                   |                  |                   |
|--------------------------------------------------------------------------------------------------------------------------------------------------------------------------------------------------------------------------------------------------|------------|--------------------------|------|---------------------------------------------------------------------------------------------------------------------------------------------------------------------------------------------------------------------------------------------------------------------------------------------------------------------------------|-------------------------------------------------|-----|-----------------|----------|----------------|-----------------------------------------------|-------------------------------------------------|-------------------------------------------|-------------------------------------------------|-------------------|------------------|-------------------|
|                                                                                                                                                                                                                                                  |            |                          |      |                                                                                                                                                                                                                                                                                                                                 |                                                 |     |                 |          |                | with IR (STIR)                                |                                                 | readout (SPGR)                            |                                                 |                   |                  |                   |
| Impact of white blood cell count on myocardial salvage, infarct size, and clinical outcomes in patients undergoing primary percutaneous coronary intervention for ST-segment elevation myocardial infarction: a magnetic resonance imaging study | Chung      | Int J Cardiovasc Imaging | 2014 | We sought to determine the relationship between white blood cell count and infarct size assessed by cardiovascular MR imaging in patients undergoing primary percutaneous coronary intervention for STEMI.                                                                                                                      | high white blood cell count                     | 91  | 56 (47, 66)     | 91.20879 | 4.7 (2.9, 9.3) | T2-weighted dark-blood TSE/FSE with IR (STIR) | Manual contouring                               | PSIR using segmented FLASH readout (SPGR) | Manual contouring                               | 63.3 (47.6, 76.5) | 22 (16.7, 33.9)  | 36.7 (23.5, 52.4) |
|                                                                                                                                                                                                                                                  |            |                          |      |                                                                                                                                                                                                                                                                                                                                 | low white blood cell count                      | 107 | 58 (51, 68)     | 83.17757 | 4.4 (2.5, 6.7) | T2-weighted dark-blood TSE/FSE with IR (STIR) | Manual contouring                               | PSIR using segmented FLASH readout (SPGR) | Manual contouring                               | 52.3 (39.3, 70.7) | 14.7 (8.5, 24.7) | 47.7 (29.6, 60.7) |
| Intracoronary compared with intravenous bolus abciximab application during primary percutaneous coronary intervention in ST-segment elevation myocardial infarction: cardiac magnetic resonance substudy of the AIDA STEMI trial                 | Eitel      | J Am Coll Cardiol        | 2013 | The aim of the AIDA STEMI (Abciximab i.v. Versus i.c. in ST-elevation Myocardial Infarction) cardiac magnetic resonance substudy was to investigate potential benefits of intracoronary versus intravenous abciximab bolus administration on infarct size and reperfusion injury in ST-segment elevation myocardial infarction. | intravenous abciximab                           | 401 | 61 (51, 71)     | 79       | 3.2 (1.8, 5.6) | T2-weighted dark-blood TSE/FSE with IR (STIR) | Signal intensity > 2 SD above remote myocardium | PSIR using segmented FLASH readout (SPGR) | Signal intensity > 5 SD above remote myocardium | 35 (25, 48)       | 17 (8, 25)       | 50 (26, 48)       |
|                                                                                                                                                                                                                                                  |            |                          |      |                                                                                                                                                                                                                                                                                                                                 | MACE                                            | 53  | 62 (51, 71)     | 76       | 3 (1.8, 5.2)   | T2-weighted dark-blood TSE/FSE with IR (STIR) | Signal intensity > 2 SD above remote myocardium | PSIR using segmented FLASH readout (SPGR) | Signal intensity > 5 SD above remote myocardium | NA                | 24 (18, 31)      | 37 (23, 55)       |
|                                                                                                                                                                                                                                                  |            |                          |      |                                                                                                                                                                                                                                                                                                                                 | no MACE                                         | 742 | 62 (51, 71)     | 76       | 3 (1.8, 5.2)   | T2-weighted dark-blood TSE/FSE with IR (STIR) | Signal intensity > 2 SD above remote myocardium | PSIR using segmented FLASH readout (SPGR) | Signal intensity > 5 SD above remote myocardium | NA                | 16 (8, 24)       | 52 (33, 69)       |
|                                                                                                                                                                                                                                                  |            |                          |      |                                                                                                                                                                                                                                                                                                                                 | intracoronary abciximab                         | 394 | 63 (51, 71)     | 73       | 2.7 (1.8, 5)   | T2-weighted dark-blood TSE/FSE with IR (STIR) | Signal intensity > 2 SD above remote myocardium | PSIR using segmented FLASH readout (SPGR) | Signal intensity > 5 SD above remote myocardium | 35 (25, 47)       | 16 (9, 25)       | 52 (25, 47)       |
| Remote ischemic post-conditioning of the lower limb during primary percutaneous coronary intervention safely reduces enzymatic infarct size in anterior myocardial infarction: a randomized controlled trial                                     | Crimi      | JACC Cardiovasc Interv   | 2013 | This study sought to evaluate whether remote ischemic post-conditioning could reduce enzymatic infarct size in patients with anterior STEMI undergoing primary percutaneous coronary intervention.                                                                                                                              | no remote ischemic post-conditioning            | 48  | 56 (11)         | 89.58333 | 3.1 (2.5, 4.2) | T2-weighted dark-blood TSE/FSE with IR (STIR) | Signal intensity > 2 SD above remote myocardium | PSIR using segmented FLASH readout (SPGR) | Manual contouring                               | 36 (15)           | 26 (13)          | NA                |
|                                                                                                                                                                                                                                                  |            |                          |      |                                                                                                                                                                                                                                                                                                                                 | remote ischemic post-conditioning               | 48  | 61 (11)         | 85.41667 | 3 (2.3, 3.8)   | T2-weighted dark-blood TSE/FSE with IR (STIR) | Signal intensity > 2 SD above remote myocardium | PSIR using segmented FLASH readout (SPGR) | Manual contouring                               | 33 (11)           | 24 (10)          | NA                |
| The assessment of area at risk and myocardial salvage after coronary revascularization in acute myocardial infarction: comparison between CMR and SPECT                                                                                          | Hadamitzky | JACC Cardiovasc Imaging  | 2013 | This study sought to compare cardiac magnetic resonance and single-photon emission computed tomography for assessment of area at risk, scar size, and salvage area after coronary reperfusion in acute myocardial infarction.                                                                                                   | STEMI                                           | 121 | 58.6 (53.1, 70) | 81.81818 | 4.9 (3.4, 8)   | T2-weighted dark-blood TSE/FSE with IR (STIR) | Signal intensity > 2 SD above remote myocardium | PSIR using segmented FLASH readout (SPGR) | Signal intensity > 3 SD above remote myocardium | 31 (14.2)         | 18.8 (14.5)      | NA                |
| Right ventricular injury in ST-elevation myocardial infarction: risk stratification by visualization of wall motion, edema, and delayed-enhancement cardiac magnetic resonance                                                                   | Grothoff   | Circ Cardiovasc Imaging  | 2012 | Aims were to determine the predictors and the prognostic significance of right ventricular injury assessed by wall motion abnormalities, edema, myocardial salvage index, and delayed enhancement in acute reperfused STEMI.                                                                                                    | right ventricular injury                        | 69  | 65 (13)         | 79.7     | 4 (2.6, 7.2)   | T2-weighted dark-blood TSE/FSE with IR (STIR) | Manual contouring                               | PSIR using segmented FLASH readout (SPGR) | Manual contouring                               | NA                | 21 (12)          | 47 (20)           |
|                                                                                                                                                                                                                                                  |            |                          |      |                                                                                                                                                                                                                                                                                                                                 | no right ventricular injury                     | 69  | 65 (11)         | 79.7     | 3 (2.2, 5.4)   | T2-weighted dark-blood TSE/FSE with IR (STIR) | Manual contouring                               | PSIR using segmented FLASH readout (SPGR) | Manual contouring                               | NA                | 17 (14)          | 59 (26)           |
| Distal protection device aggravated microvascular obstruction evaluated by cardiac MR after primary percutaneous intervention for                                                                                                                | Yoon       | Int J Cardiol            | 2012 | In a prospective randomized trial, we investigated the mechanism of the poor effect of distal                                                                                                                                                                                                                                   | no distal protection and no thrombus aspiration | 55  | 58 (11)         | 78.7     | 5.2 (2.6)      | T2-weighted dark-blood TSE/FSE with IR (STIR) | Signal intensity > 2 SD above remote myocardium | PSIR using segmented FLASH readout (SPGR) | Signal intensity > 5 SD above remote myocardium | 46.1 (16.4)       | 35.1 (14.6)      | 27.6 (20.8)       |

|                                                                                                                                                                                                               |         |                           |      |                                                                                                                                                                                                                                                                 |                                                                                                        |     |             |          |                |                                                    |                                                 |                                           |                                                 |                   |                   |                   |
|---------------------------------------------------------------------------------------------------------------------------------------------------------------------------------------------------------------|---------|---------------------------|------|-----------------------------------------------------------------------------------------------------------------------------------------------------------------------------------------------------------------------------------------------------------------|--------------------------------------------------------------------------------------------------------|-----|-------------|----------|----------------|----------------------------------------------------|-------------------------------------------------|-------------------------------------------|-------------------------------------------------|-------------------|-------------------|-------------------|
| ST-elevation myocardial infarction                                                                                                                                                                            |         |                           |      | protection and thrombus aspiration in 126 patients with STEMI.                                                                                                                                                                                                  | distal protection and thrombus aspiration                                                              | 55  | 58 (12)     | 80       | 4.9 (2.2)      | T2-weighted dark-blood TSE/FSE with IR (STIR)      | Signal intensity > 2 SD above remote myocardium | PSIR using segmented FLASH readout (SPGR) | Signal intensity > 5 SD above remote myocardium | 50 (14.1)         | 34.7 (13.6)       | 31.6 (18.8)       |
| Comparison of magnetic resonance imaging findings in non-ST-segment elevation versus ST-segment elevation myocardial infarction patients undergoing early invasive intervention                               | Xu      | Int J Cardiovasc Imaging  | 2012 | To define causes and pathological mechanisms underlying differences in clinical outcomes, we compared the findings of contrast-enhanced MR imaging between STEMI and NSTEMI.                                                                                    | STEMI                                                                                                  | 113 | 58 (12.3)   | 85.84071 | 4.6 (2.7, 9.6) | T2-weighted dark-blood TSE/FSE with IR (STIR)      | Signal intensity > 2 SD above remote myocardium | PSIR using segmented FLASH readout (SPGR) | Manual contouring                               | 32.9 (22.7, 45.9) | 19.2 (10.3, 30.7) | 40.5 (24.8, 83.5) |
| T2-weighted cardiac MR assessment of the myocardial area-at-risk and salvage area in acute reperfused myocardial infarction: Comparison of state-of-the-art dark blood and bright blood T2-weighted sequences | Viallon | J Cardiov Magn Reson      | 2012 | To compare different state-of-the-art T2-weighted imaging sequences combined with late gadolinium enhancement for myocardial salvage area assessment by cardiac MR imaging.                                                                                     | T2 Short-Tau Inversion Recovery Turbo Spin Echo                                                        | 30  | 55 (13)     | 83.33333 | 5 (3.6)        | T2-weighted dark-blood TSE/FSE with IR (STIR)      | FWHM algorithm                                  | PSIR using segmented FLASH readout (SPGR) | FWHM algorithm                                  | 48 (39, 55)       | 21.2 (12.9)       | NA                |
|                                                                                                                                                                                                               |         |                           |      |                                                                                                                                                                                                                                                                 | T2 Steady State Free Precession                                                                        | 30  | 55 (13)     | 83.33333 | 5 (3.6)        | T2-prepared bright-blood single-shot balanced SSFP | FWHM algorithm                                  | PSIR using segmented FLASH readout (SPGR) | FWHM algorithm                                  | 41 (28, 54)       | 21.2 (12.9)       | NA                |
|                                                                                                                                                                                                               |         |                           |      |                                                                                                                                                                                                                                                                 | hybrid T2 Turbo Spin Echo and Steady State Free Precession (=Acquisition for Cardiac Unified T2 Edema) | 30  | 55 (13)     | 83.33333 | 5 (3.6)        | Hybrid TSE-SSFP (ACUTE)                            | FWHM algorithm                                  | PSIR using segmented FLASH readout (SPGR) | FWHM algorithm                                  | 40 (26, 49)       | 21.2 (12.9)       | NA                |
|                                                                                                                                                                                                               |         |                           |      |                                                                                                                                                                                                                                                                 | T2 Turbo Spin Echo with blade k-space coverage                                                         | 30  | 55 (13)     | 83.33333 | 5 (3.6)        | BLADE k-space coverage for dark-blood TSE          | FWHM algorithm                                  | PSIR using segmented FLASH readout (SPGR) | FWHM algorithm                                  | 46 (33, 55)       | 21.2 (12.9)       | NA                |
| A high loading dose of clopidogrel reduces myocardial infarct size in patients undergoing primary percutaneous coronary intervention: a magnetic resonance imaging study                                      | Song    | Am Heart J                | 2012 | We sought to determine whether a 600-mg loading dose of clopidogrel reduces myocardial infarct size compared with a 300-mg dose using contrast-enhanced magnetic resonance imaging in patients undergoing primary percutaneous coronary intervention for STEMI. | 600mg Clopidogrel                                                                                      | 117 | 59 (51, 68) | 82.90598 | 4.8 (2.8, 8)   | T2-weighted dark-blood TSE/FSE with IR (STIR)      | Manual contouring                               | PSIR using segmented FLASH readout (SPGR) | Manual contouring                               | 31.5 (22.6, 46)   | 17.3 (8.9, 26.2)  | 47.7 (33.7, 60.9) |
|                                                                                                                                                                                                               |         |                           |      |                                                                                                                                                                                                                                                                 | 300mg Clopidogrel                                                                                      | 81  | 55 (47, 66) | 92.59259 | 4 (2.7, 6.2)   | T2-weighted dark-blood TSE/FSE with IR (STIR)      | Manual contouring                               | PSIR using segmented FLASH readout (SPGR) | Manual contouring                               | 33.1 (26.2, 45.2) | 21.7 (12.9, 30)   | 32 (23.6, 51.5)   |
| Microvascular resistance predicts myocardial salvage and infarct characteristics in ST-elevation myocardial infarction                                                                                        | Payne   | J Am Heart Assoc          | 2012 | We investigated the relationships among culprit artery microvascular resistance, myocardial salvage, and ventricular function.                                                                                                                                  | all patients                                                                                           | 108 | 57.8 (10.2) | 83.33333 | 3.1 (2.3, 5.5) | Hybrid TSE-SSFP (ACUTE)                            | Signal intensity > 2 SD above remote myocardium | PSIR using segmented FLASH readout (SPGR) | Signal intensity > 2 SD above remote myocardium | 32.9 (12.4)       | 23.5 (14.2)       | 19.2 (36.3)       |
| Quantification of myocardial area at risk: validation of coronary angiographic scores with cardiovascular magnetic resonance methods                                                                          | Moral   | Rev Esp Cardiol (Engl Ed) | 2012 | Our objective was to compare the myocardial area-at-risk estimated by Bypass Angioplasty Revascularization Investigation Myocardial Jeopardy Index (BARI) and Alberta Provincial Project for Outcome                                                            | all patients                                                                                           | 70  | 57.7 (13.9) | 88.57143 | 4.5 (1.2)      | T2-weighted dark-blood TSE/FSE with IR (STIR)      | Signal intensity > 2 SD above remote myocardium | PSIR using segmented FLASH readout (SPGR) | Signal intensity > 5 SD above remote myocardium | 36.9 (14.3)       | 24.2 (13.5)       | 12.8 (8.6)        |

|                                                                                                                                                                                                         |          |                           |      |                                                                                                                                                                                                                     |                                               |     |             |          |                |                                               |                                                 |                                           |                                                 |                   |                   |             |
|---------------------------------------------------------------------------------------------------------------------------------------------------------------------------------------------------------|----------|---------------------------|------|---------------------------------------------------------------------------------------------------------------------------------------------------------------------------------------------------------------------|-----------------------------------------------|-----|-------------|----------|----------------|-----------------------------------------------|-------------------------------------------------|-------------------------------------------|-------------------------------------------------|-------------------|-------------------|-------------|
|                                                                                                                                                                                                         |          |                           |      | Assessment in Coronary Heart Disease (APPROACH) angiographic scores with those determined by cardiovascular MR imaging.                                                                                             |                                               |     |             |          |                |                                               |                                                 |                                           |                                                 |                   |                   |             |
| Analysis of post-infarction salvaged myocardium by cardiac magnetic resonance. Predictors and influence on adverse ventricular remodeling                                                               | Monmeneu | Rev Esp Cardiol (Engl Ed) | 2012 | To evaluate by cardiovascular MR imaging those factors related to the amount of salvaged myocardium after a myocardial infarction and its value in predicting adverse ventricular remodeling.                       | median MSI =< 31%                             | 59  | 58 (13)     | 77.9661  | 4.3 (3, 7)     | T2-weighted dark-blood TSE/FSE with IR (STIR) | Signal intensity > 2 SD above remote myocardium | PSIR using segmented FLASH readout (SPGR) | Signal intensity > 2 SD above remote myocardium | 31 (16)           | 28 (15)           | NA          |
|                                                                                                                                                                                                         |          |                           |      |                                                                                                                                                                                                                     | median MSI > 31%                              | 59  | 60 (12)     | 72.88136 | 2.6 (1.9, 3.1) | T2-weighted dark-blood TSE/FSE with IR (STIR) | Signal intensity > 2 SD above remote myocardium | PSIR using segmented FLASH readout (SPGR) | Signal intensity > 2 SD above remote myocardium | 29 (14)           | 13 (9)            | NA          |
| Aborted Myocardial Infarction: Evaluation of Changes in Area at Risk, Late Gadolinium Enhancement, and Perfusion Over Time and Comparison With Overt Myocardial Infarction                              | Lee      | AJR Am J Roentgenol       | 2012 | To analyze comprehensive MRI findings of aborted myocardial infarction in terms of the area at risk, late enhancement, and perfusion on initial and follow-up studies compared with overt MI.                       | overt myocardial infarction                   | 18  | 59 (49, 65) | 72.22222 | 3.2 (2.9, 6.1) | T2-weighted dark-blood TSE/FSE with IR (STIR) | Signal intensity > 2 SD above remote myocardium | PSIR using segmented FLASH readout (SPGR) | Signal intensity > 5 SD above remote myocardium | 39.5 (27, 60.9)   | 23.5 (16.3, 39.3) | NA          |
|                                                                                                                                                                                                         |          |                           |      |                                                                                                                                                                                                                     | aborted myocardial infarction                 | 11  | 60 (52, 71) | 72.72727 | 1.7 (1.4, 2.6) | T2-weighted dark-blood TSE/FSE with IR (STIR) | Signal intensity > 2 SD above remote myocardium | PSIR using segmented FLASH readout (SPGR) | Signal intensity > 5 SD above remote myocardium | 36.8 (29.8, 43.1) | 4.8 (0, 11.9)     | NA          |
| Cardiovascular magnetic resonance-derived intramyocardial hemorrhage after STEMI: Influence on long-term prognosis, adverse left ventricular remodeling and relationship with microvascular obstruction | Husser   | Int J Cardiol             | 2013 | The value of MR imaging-derived intramyocardial hemorrhage for predicting major adverse cardiac events and adverse cardiac remodeling after STEMI and its relationship with microvascular obstruction was analyzed. | occurrence of a major cardiovascular event    | 47  | 61 (13)     | 76.59574 | 4.7 (3.2)      | T2-weighted dark-blood TSE/FSE with IR (STIR) | Signal intensity > 2 SD above remote myocardium | IR with single-shot SSFP                  | Signal intensity > 2 SD above remote myocardium | 41 (19)           | 32 (18)           | NA          |
|                                                                                                                                                                                                         |          |                           |      |                                                                                                                                                                                                                     | intramyocardial haemorrhage                   | 102 | 57 (12)     | 79.41176 | 4.5 (3.1)      | T2-weighted dark-blood TSE/FSE with IR (STIR) | Signal intensity > 2 SD above remote myocardium | IR with single-shot SSFP                  | Signal intensity > 2 SD above remote myocardium | 42 (15)           | 35 (15)           | NA          |
|                                                                                                                                                                                                         |          |                           |      |                                                                                                                                                                                                                     | no occurrence of a major cardiovascular event | 257 | 57 (12)     | 80.93385 | 4.1 (3.2)      | T2-weighted dark-blood TSE/FSE with IR (STIR) | Signal intensity > 2 SD above remote myocardium | IR with single-shot SSFP                  | Signal intensity > 2 SD above remote myocardium | 29 (15)           | 21 (14)           | NA          |
|                                                                                                                                                                                                         |          |                           |      |                                                                                                                                                                                                                     | no intramyocardial haemorrhage                | 202 | 59 (12)     | 80.69307 | 4 (3.2)        | T2-weighted dark-blood TSE/FSE with IR (STIR) | Signal intensity > 2 SD above remote myocardium | IR with single-shot SSFP                  | Signal intensity > 2 SD above remote myocardium | 25 (14)           | 16 (11)           | NA          |
| Reliability of myocardial salvage assessment by cardiac magnetic resonance imaging in acute reperfused myocardial infarction                                                                            | Desch    | Int J Cardiovasc Imaging  | 2012 | The aim of this study was to evaluate the reliability of salvaged myocardium measurements by cardiac MR imaging.                                                                                                    | all patients                                  | 20  | 58 (11)     | 60       | 3.7 (1.7)      | T2-weighted dark-blood TSE/FSE with IR (STIR) | Manual contouring                               | PSIR using segmented FLASH readout (SPGR) | Manual contouring                               | 33.7 (9)          | 18.2 (7.5)        | 43.8 (22.5) |
| Dynamic Changes in ST Segment Resolution After Myocardial Infarction and the Association with Microvascular Injury on Cardiac Magnetic Resonance Imaging                                                | Weaver   | Heart Lung Circ           | 2011 | The aim of this study was to assess whether the development of microvascular obstruction or intramyocardial hemorrhage has an impact upon ST segment resolution.                                                    | no microvascular obstruction                  | 17  | 60 (NA, NA) | 80.4878  | 3.8 (2.9, 5.3) | T2-weighted dark-blood TSE/FSE with IR (STIR) | Signal intensity > 2 SD above remote myocardium | PSIR using segmented FLASH readout (SPGR) | Signal intensity > 2 SD above remote myocardium | 31 (26, 34)       | 15 (10, 23)       | NA          |
|                                                                                                                                                                                                         |          |                           |      |                                                                                                                                                                                                                     | microvascular obstruction                     | 24  | 58 (NA, NA) | 80.4878  | 3.2 (2.4, 5.7) | T2-weighted dark-blood TSE/FSE with IR (STIR) | Signal intensity > 2 SD above remote myocardium | PSIR using segmented FLASH readout (SPGR) | Signal intensity > 2 SD above remote myocardium | 45 (35, 51)       | 28 (19, 39)       | NA          |
| Reperfusion haemorrhage as determined by cardiovascular MRI is a predictor of adverse left ventricular remodelling and markers of late arrhythmic risk                                                  | Mather   | Heart                     | 2011 | To assess whether the presence of myocardial haemorrhage influences ventricular remodelling and risk of late ventricular arrhythmia following percutaneous                                                          | no microvascular obstruction or haemorrhage   | 18  | 57 (9.2)    | 88.88889 | 3.7 (2.5, 4.7) | T2-weighted dark-blood TSE/FSE with IR (STIR) | Signal intensity > 2 SD above remote myocardium | PSIR using segmented FLASH readout (SPGR) | Signal intensity > 2 SD above remote myocardium | 29.2 (13.3)       | 16.3 (9.4)        | NA          |

|                                                                                                                                                                                                                                                                                                        |         |                         |      |                                                                                                                                                                                                                                                                                                               |                                |     |             |          |                |                                               |                                                 |                                           |                                                 |                   |                   |             |
|--------------------------------------------------------------------------------------------------------------------------------------------------------------------------------------------------------------------------------------------------------------------------------------------------------|---------|-------------------------|------|---------------------------------------------------------------------------------------------------------------------------------------------------------------------------------------------------------------------------------------------------------------------------------------------------------------|--------------------------------|-----|-------------|----------|----------------|-----------------------------------------------|-------------------------------------------------|-------------------------------------------|-------------------------------------------------|-------------------|-------------------|-------------|
|                                                                                                                                                                                                                                                                                                        |         |                         |      | coronary intervention for acute myocardial infarction.                                                                                                                                                                                                                                                        | haemorrhage                    | 12  | 56 (11.6)   | 91.66667 | 3.7 (5.2, 5.2) | T2-weighted dark-blood TSE/FSE with IR (STIR) | Signal intensity > 2 SD above remote myocardium | PSIR using segmented FLASH readout (SPGR) | Signal intensity > 2 SD above remote myocardium | 43.2 (20.8)       | 36.2 (15.3)       | NA          |
|                                                                                                                                                                                                                                                                                                        |         |                         |      |                                                                                                                                                                                                                                                                                                               | microvascular obstruction only | 18  | 58 (8.1)    | 88.88889 | 2.9 (3.9, 3.9) | T2-weighted dark-blood TSE/FSE with IR (STIR) | Signal intensity > 2 SD above remote myocardium | PSIR using segmented FLASH readout (SPGR) | Signal intensity > 2 SD above remote myocardium | 40.7 (9.7)        | 29.5 (11.1)       | NA          |
| Timing of cardiovascular MR imaging after acute myocardial infarction: effect on estimates of infarct characteristics and prediction of late ventricular remodeling                                                                                                                                    | Mather  | Radiology               | 2011 | To define the evolution of infarct characteristics with cardiovascular MR imaging and to assess which of the cardiovascular MR imaging data acquired at day 2 or at 1 week after acute myocardial infarction, is the stronger predictor of infarct size and LV function measured at 3 months.                 | all patients                   | 48  | 57 (9)      | 89.58333 | 3.4 (4.2, 4.2) | T2-weighted dark-blood TSE/FSE with IR (STIR) | Signal intensity > 2 SD above remote myocardium | PSIR using segmented FLASH readout (SPGR) | Signal intensity > 2 SD above remote myocardium | 37.9 (15.2)       | 27.2 (13.9)       | 27.6 (23)   |
| Myocardium at risk in ST-segment elevation myocardial infarction comparison of T2-weighted edema imaging with the MR-assessed endocardial surface area and validation against angiographic scoring                                                                                                     | Fuernau | JACC Cardiovasc Imaging | 2011 | The objective of this study was to assess the area at risk in STEMI with 2 different cardiac MR imaging methods and to compare them with the validated angiographic Alberta Provincial Project for Outcome Assessment in Coronary Heart Disease Score (APPROACH-score) in a large consecutive patient cohort. | all patients                   | 197 | 65.4 (12.4) | 69.03553 | 3.9 (4.8, 4.8) | T2-weighted dark-blood TSE/FSE with IR (STIR) | Manual contouring                               | PSIR using segmented FLASH readout (SPGR) | Manual contouring                               | 35.6 (10.9)       | 18.2 (11.7)       | 49.3 (27.3) |
| The evaluation of an electrocardiographic myocardial ischemia acuteness score to predict the amount of myocardial salvage achieved by early percutaneous coronary intervention Clinical validation with myocardial perfusion single photon emission computed tomography and cardiac magnetic resonance | Engblom | J Electrocardiol        | 2011 | The aim was to study whether acute ischemic electrocardiographic changes can predict the amount of salvageable myocardium in patients with acute STEMI.                                                                                                                                                       | all patients                   | 38  | 62 (11)     | 86.84211 | 3.2 (1.8)      | T2-weighted dark-blood TSE/FSE with IR (STIR) | Manual contouring                               | PSIR using segmented FLASH readout (SPGR) | Heiberg's method                                | 35 (11)           | 12 (11)           | 67 (23)     |
| Prognostic value and determinants of a hypointense infarct core in T2-weighted cardiac magnetic resonance in acute reperfused ST-elevation-myocardial infarction                                                                                                                                       | Eitel   | Circ Cardiovasc Imaging | 2011 | The aim of this study was to evaluate determinants and prognostic impact of a hypointense infarct core in T2-weighted cardiac MR images, studied in patients after acute, reperfused STEMI.                                                                                                                   | hypointense core present       | 122 | 62 (53, 72) | 77       | 3.2 (2.3, 5.7) | T2-weighted dark-blood TSE/FSE with IR (STIR) | Signal intensity > 2 SD above remote myocardium | PSIR using segmented FLASH readout (SPGR) | Signal intensity > 5 SD above remote myocardium | 38.9 (31.3, 47.4) | 27.1 (17.5, 34.9) | NA          |
|                                                                                                                                                                                                                                                                                                        |         |                         |      |                                                                                                                                                                                                                                                                                                               | hypointense core absent        | 224 | 65 (54, 73) | 72       | 3 (2.1, 5.4)   | T2-weighted dark-blood TSE/FSE with IR (STIR) | Signal intensity > 2 SD above remote myocardium | PSIR using segmented FLASH readout (SPGR) | Signal intensity > 5 SD above remote myocardium | 32.2 (25.5, 39.3) | 13 (5.7, 20.8)    | NA          |
| Long-term prognostic value of myocardial salvage assessed by cardiovascular magnetic resonance in acute reperfused myocardial infarction                                                                                                                                                               | Eitel   | Heart                   | 2011 | The aim of this study was to investigate whether the early prognostic significance of myocardial salvage assessed by cardiac MR imaging is sustained at long-term clinical follow-up in patients                                                                                                              | low MSI (median, 28)           | 104 | 67 (55, 75) | 70.19231 | 4.8 (2.8, 7.1) | T2-weighted dark-blood TSE/FSE with IR (STIR) | Signal intensity > 2 SD above remote myocardium | PSIR using segmented FLASH readout (SPGR) | Signal intensity > 5 SD above remote myocardium | 35.2 (29.5, 43.1) | 25.7 (19.4, 32.6) | 28 (19, 38) |
|                                                                                                                                                                                                                                                                                                        |         |                         |      |                                                                                                                                                                                                                                                                                                               | high MSI (median, 73)          | 104 | 64 (55, 74) | 67.30769 | 3.1 (21, 5)    | T2-weighted dark-blood TSE/FSE                | Signal intensity > 2 SD above                   | PSIR using segmented FLASH                | Signal intensity > 5 SD above                   | 37.3 (29.1, 47.3) | 10.3 (5.4, 14.3)  | 73 (60, 82) |

|                                                                                                                                                                                                                                                  |          |                         |      | with STEMI undergoing primary angioplasty.                                                                                                                                                                                                                                                                                                                        |                                                                             |     |         |          |           | with IR (STIR)                                | remote myocardium                               | readout (SPGR)                            | remote myocardium                               |         |            |         |
|--------------------------------------------------------------------------------------------------------------------------------------------------------------------------------------------------------------------------------------------------|----------|-------------------------|------|-------------------------------------------------------------------------------------------------------------------------------------------------------------------------------------------------------------------------------------------------------------------------------------------------------------------------------------------------------------------|-----------------------------------------------------------------------------|-----|---------|----------|-----------|-----------------------------------------------|-------------------------------------------------|-------------------------------------------|-------------------------------------------------|---------|------------|---------|
| Cardiovascular magnetic resonance of the myocardium at risk in acute reperfused myocardial infarction: comparison of T2-weighted imaging versus the circumferential endocardial extent of late gadolinium enhancement with transmural projection | Ubachs   | J Cardiov Magn Reson    | 2010 | We sought to assess the ability of endocardial extent of infarction by LGE cardiac MR imaging to predict myocardium at risk as compared to T2-weighted imaging.                                                                                                                                                                                                   | all patients                                                                | 37  | 62 (10) | 86.48649 | 3.3 (2.2) | T2-weighted dark-blood TSE/FSE with IR (STIR) | Manual contouring                               | PSIR using segmented FLASH readout (SPGR) | Heiberg's method                                | 34 (10) | 14 (10)    | 58 (22) |
| Myocardial salvage by CMR correlates with LV remodeling and early ST-segment resolution in acute myocardial infarction                                                                                                                           | Masci    | JACC Cardiovasc Imaging | 2010 | The purpose of this study was to assess the association of myocardial salvage by cardiac MR imaging with left ventricular LV remodeling and early ST-segment resolution in patients with acute myocardial infarction.                                                                                                                                             | all patients                                                                | 137 | 61 (12) | 81.0219  | 3.7 (2.1) | T2-weighted dark-blood TSE/FSE with IR (STIR) | Signal intensity > 2 SD above remote myocardium | PSIR using segmented FLASH readout (SPGR) | Signal intensity > 5 SD above remote myocardium | 32 (15) | 18 (13)    | NA      |
| A pilot study of rapid cooling by cold saline and endovascular cooling before reperfusion in patients with ST-elevation myocardial infarction                                                                                                    | Gotberg  | Circ Cardiovasc Interv  | 2010 | We aimed to evaluate the safety and feasibility of rapidly induced hypothermia by infusion of cold saline and endovascular cooling catheter before reperfusion in patients with acute myocardial infarction.                                                                                                                                                      | hypothermia                                                                 | 9   | 62 (10) | 77.77778 | 2.9 (0.9) | T2-weighted dark-blood TSE/FSE with IR (STIR) | Manual contouring                               | PSIR using segmented FLASH readout (SPGR) | Heiberg's method                                | 44 (8)  | 13.7 (6.4) | NA      |
|                                                                                                                                                                                                                                                  |          |                         |      |                                                                                                                                                                                                                                                                                                                                                                   | no hypothermia                                                              | 9   | 58 (7)  | 77.77778 | 2.9 (1)   | T2-weighted dark-blood TSE/FSE with IR (STIR) | Manual contouring                               | PSIR using segmented FLASH readout (SPGR) | Heiberg's method                                | 43 (8)  | 20.5 (10)  | NA      |
| Quantification of myocardial area at risk with T2-weighted CMR: comparison with contrast-enhanced CMR and coronary angiography                                                                                                                   | Wright   | JACC Cardiovasc Imaging | 2009 | We compared the volume of hyperintense myocardium on T2-weighted cardiac MR imaging with the myocardial area at risk determined by contrast-enhanced cardiac MR imaging with infarct endocardial surface length and the area at risk estimated by conventional coronary angiography with the BARI (Bypass Angioplasty Revascularization Investigation) risk scor. | all patients                                                                | 108 | 59 (11) | 84.25926 | 4.2 (2.3) | T2-weighted dark-blood TSE/FSE with IR (STIR) | Signal intensity > 2 SD above remote myocardium | PSIR using segmented FLASH readout (SPGR) | Manual contouring                               | 32 (16) | 17 (12)    | NA      |
| Impact of primary coronary angioplasty delay on myocardial salvage, infarct size, and microvascular damage in patients with ST-segment elevation myocardial infarction: insight from cardiovascular magnetic resonance                           | Francone | J Am Coll Cardiol       | 2009 | We investigated the extent and nature of myocardial damage by using cardiovascular MR imaging in relation to different time-to-reperfusion intervals.                                                                                                                                                                                                             | fourth quartile (time between symptom onset and reperfusion 9h in the mean) | 17  | 58 (11) | 52.94118 | 9 (3.5)   | T2-weighted dark-blood TSE/FSE with IR (STIR) | Signal intensity > 2 SD above remote myocardium | PSIR using segmented FLASH readout (SPGR) | Signal intensity > 5 SD above remote myocardium | 19 (4)  | 16.9 (6)   | NA      |
|                                                                                                                                                                                                                                                  |          |                         |      |                                                                                                                                                                                                                                                                                                                                                                   | third quartile (time between symptom onset and reperfusion 5h in the mean)  | 17  | 57 (13) | 58.82353 | 5 (0.9)   | T2-weighted dark-blood TSE/FSE with IR (STIR) | Signal intensity > 2 SD above remote myocardium | PSIR using segmented FLASH readout (SPGR) | Signal intensity > 5 SD above remote myocardium | 15 (8)  | 12.6 (10)  | NA      |
|                                                                                                                                                                                                                                                  |          |                         |      |                                                                                                                                                                                                                                                                                                                                                                   | second quartile                                                             | 17  | 57 (10) | 76.47059 | 2.4 (0.4) | T2-weighted dark-blood                        | Signal intensity > 2                            | PSIR using segmented                      | Signal intensity > 5                            | 15 (8)  | 11.8 (10)  | NA      |

|  |  |  |  |  |                                                                            |    |          |          |         |                                               |                                                 |                                           |                                                 |        |         |    |
|--|--|--|--|--|----------------------------------------------------------------------------|----|----------|----------|---------|-----------------------------------------------|-------------------------------------------------|-------------------------------------------|-------------------------------------------------|--------|---------|----|
|  |  |  |  |  | (time between symptom onset and reperfusion 2.4h in the mean)              |    |          |          |         | TSE/FSE with IR (STIR)                        | SD above remote myocardium                      | FLASH readout (SPGR)                      | SD above remote myocardium                      |        |         |    |
|  |  |  |  |  | first quartile (time between symptom onset and reperfusion 1h in the mean) | 19 | 58 (7.3) | 78.94737 | 1 (0.1) | T2-weighted dark-blood TSE/FSE with IR (STIR) | Signal intensity > 2 SD above remote myocardium | PSIR using segmented FLASH readout (SPGR) | Signal intensity > 5 SD above remote myocardium | 16 (9) | 7.5 (9) | NA |

MRI: magnetic resonance imaging, STEMI: ST-segment elevation myocardial infarction, SD: standard deviation, TSE: turbo spin echo, FSE: fast spin echo, IR: inversion recovery, STIR: short tau inversion recovery, SSFP: steady state free precession, ACUTE: Acquisition for Cardiac Unified T2 Edema, PSIR: phase sensitive inversion recovery, FLASH: fast low angle shot, SPGR: spoiled gradient echo, FWHM: full width at half maximum; time to reperfusion = time from symptom onset until revascularization.
